# Supplementary material for: Nutraceutical Potential of Lentinula edodes’ Spent Mushroom Substrate: A Comprehensive Study on Phenolic Composition, Antioxidant Activity, and Antibacterial Effects
Source: MDPI journal article supplement (doi:10.3390/jof9121200), 2023-12-15
Supplement: s1 [file s1]

**Figure S1.** Antibacterial assay *S. aureus* (ATCC 23235) example of the antagonistic effect of the extracts on the antibiotic used.

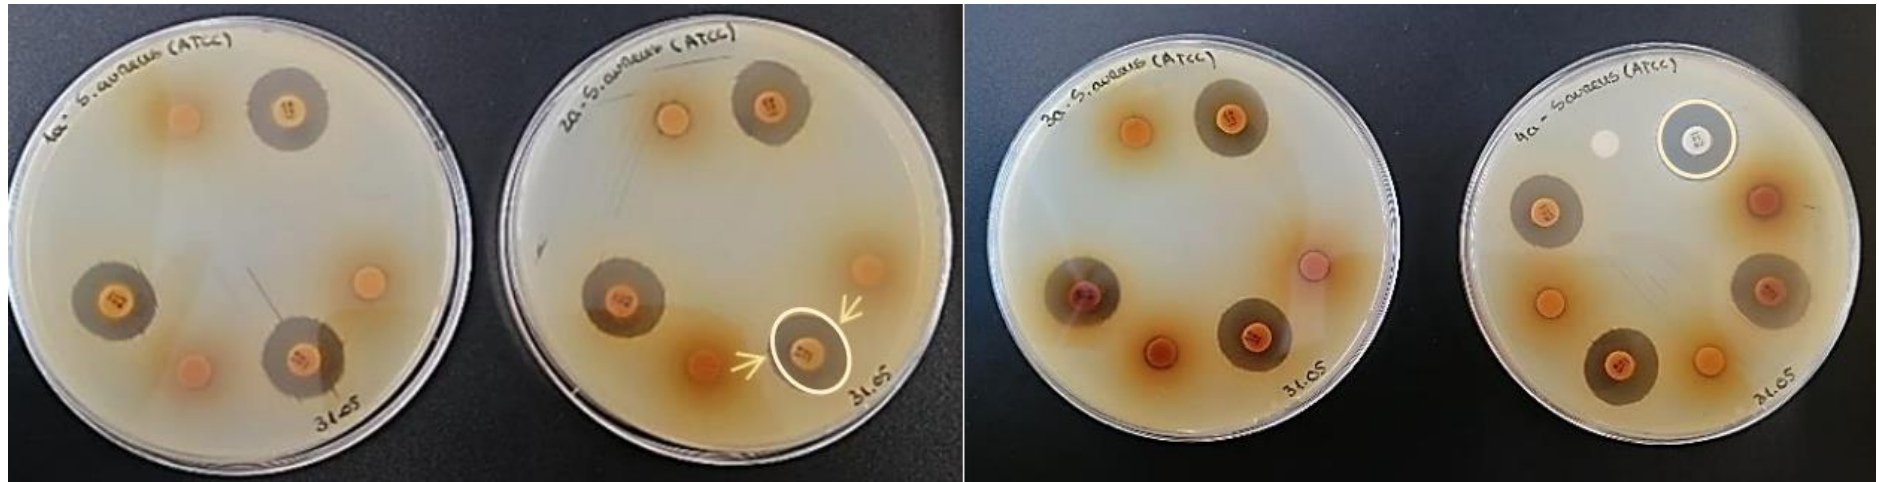

**Table S1.** Polyphenol Composition Analysis in Spent Mushroom Substrate Extracts: Impact of Solvent and Extraction Method

| Samples           | Total Phenols<br>(mg GA g <sup>-1</sup> ) | <i>Ortho</i> -diphenols<br>(mg GA g <sup>-1</sup> ) | Flavonoids<br>(mg CAT g <sup>-1</sup> ) |
|-------------------|-------------------------------------------|-----------------------------------------------------|-----------------------------------------|
| Solvent           |                                           |                                                     |                                         |
| w                 | 97.60 ± 2.46 <sup>b</sup>                 | 319.93 ± 4.26 <sup>b</sup>                          | 40.20 ± 1.35 <sup>b</sup>               |
| et                | 156.98 ± 2.13 <sup>a</sup>                | 395.74 ± 4.41 <sup>a</sup>                          | 57.53 ± 1.35 <sup>a</sup>               |
| Extraction method |                                           |                                                     |                                         |
| SE                | 103.10 ± 4.12 <sup>cd</sup>               | 242.80 ± 7.63 <sup>e</sup>                          | 242.80 ± 7.63 <sup>c</sup>              |
| LE                | 98.52 ± 3.69 <sup>d</sup>                 | 260.89 ± 6.83 <sup>e</sup>                          | 260.89 ± 6.83 <sup>c</sup>              |
| LE-HT             | 190.61 ± 4.12 <sup>a</sup>                | 517.07 ± 7.63 <sup>a</sup>                          | 517.07 ± 7.63 <sup>a</sup>              |
| UE                | 111.37 ± 3.69 <sup>c</sup>                | 347.17 ± 8.36 <sup>c</sup>                          | 347.17 ± 8.36 <sup>b</sup>              |
| COMB              | 103.52 ± 4.12 <sup>cd</sup>               | 323.16 ± 6.83 <sup>d</sup>                          | 323.16 ± 6.83 <sup>b</sup>              |
| COMB-HT           | 156.63 ± 4.12 <sup>b</sup>                | 455.91 ± 7.63 <sup>b</sup>                          | 455.91 ± 7.63 <sup>a</sup>              |

w, distilled water; et, ethanol 50% (v/v) solvent; SE, short extraction; LE, 24 h extraction; LE-HT, 24 h extraction with high temperature; UE, ultrasound extraction; COMB, combined methods (LE+UE); COMB-HT, combined methods (LE-HT+UE). The presented values are means ± standard deviation of triplicate measurements. Means in the same column with different letters were significantly different (P<0.05, ANOVA, Tukey-HSD).

**Table S2.** Results of the evaluation of the antioxidant capacity of the spent mushroom substrate extracts, by solvent and by extraction method.

| Samples           | ABTS <sup>•+</sup>             | DPPH <sup>•</sup>              | FRAP                           |
|-------------------|--------------------------------|--------------------------------|--------------------------------|
|                   | (mmol Trolox g <sup>-1</sup> ) | (mmol Trolox g <sup>-1</sup> ) | (mmol Trolox g <sup>-1</sup> ) |
| Solvent           |                                |                                |                                |
| w                 | 0.487 ± 0.010 <sup>b</sup>     | 0.327 ± 0.008 <sup>b</sup>     | 0.675 ± 0.012 <sup>a</sup>     |
| et                | 0.665 ± 0.011 <sup>a</sup>     | 0.777 ± 0.007 <sup>a</sup>     | 0.696 ± 0.012 <sup>a</sup>     |
| Extraction method |                                |                                |                                |
| SE                | 0.409 ± 0.017 <sup>c</sup>     | 0.525 ± 0.013 <sup>c</sup>     | 0.570 ± 0.020 <sup>c</sup>     |
| LE                | 0.510 ± 0.017 <sup>b</sup>     | 0.463 ± 0.013 <sup>d</sup>     | 0.573 ± 0.022 <sup>c</sup>     |
| LE-HT             | 0.762 ± 0.021 <sup>a</sup>     | 0.855 ± 0.014 <sup>a</sup>     | 1.031 ± 0.020 <sup>a</sup>     |
| UE                | 0.533 ± 0.019 <sup>b</sup>     | 0.411 ± 0.014 <sup>e</sup>     | 0.563 ± 0.025 <sup>c</sup>     |
| COMB              | 0.538 ± 0.017 <sup>b</sup>     | 0.475 ± 0.014 <sup>d</sup>     | 0.521 ± 0.020 <sup>c</sup>     |
| COMB-HT           | 0.703 ± 0.019 <sup>a</sup>     | 0.584 ± 0.014 <sup>b</sup>     | 0.857 ± 0.020 <sup>b</sup>     |

w, distilled water; et, ethanol 50% (v/v) solvent; SE, short extraction; LE, 24 h extraction; LE-HT, 24 h extraction with high temperature; UE, ultrasound extraction; COMB, combined methods (LE+UE); COMB-HT, combined methods (LE-HT+UE). The presented values are means ± standard deviation of triplicate measurements. Means in the same column with different letters were significantly different (P<0.05, ANOVA, Tukey-HSD).

**Table S3.** Diameter measurements for each extract alone compared with the positive control (gentamicin).

|             | <i>S. aureus</i><br>(ATCC 23235) | <i>A. hydrophila</i><br>(C2GSPA1) | <i>P. aeruginosa</i><br>(C3GSPR1) | <i>V. fluvialis</i><br>(RimA1TCBS) |
|-------------|----------------------------------|-----------------------------------|-----------------------------------|------------------------------------|
| Control (+) | 18.0 <sup>a</sup>                | 18.0 <sup>a</sup>                 | 12.0 <sup>a</sup>                 | 23.0 <sup>a</sup>                  |
| w-SE        | 0.0 <sup>c</sup>                 | 8.0 <sup>c</sup>                  | 8.0 <sup>d</sup>                  | 7.0 <sup>c</sup>                   |
| et-SE       | 7.0 <sup>b</sup>                 | 0.0 <sup>i</sup>                  | 9.0 <sup>c</sup>                  | 0.0 <sup>d</sup>                   |
| w-LE        | 0.0 <sup>c</sup>                 | 9.0 <sup>d</sup>                  | 9.0 <sup>c</sup>                  | 7.0 <sup>c</sup>                   |
| et-LE       | 7.0 <sup>b</sup>                 | 8.0 <sup>c</sup>                  | 8.0 <sup>d</sup>                  | 0.0 <sup>d</sup>                   |
| w-LE-HT     | 0.0 <sup>c</sup>                 | 9.0 <sup>c</sup>                  | 9.0 <sup>c</sup>                  | 8.0 <sup>b</sup>                   |
| et-LE-HT    | 7.0 <sup>b</sup>                 | 10.0 <sup>b</sup>                 | 10.0 <sup>b</sup>                 | 7.0 <sup>c</sup>                   |
| w-UE        | 7.0 <sup>b</sup>                 | 8.0 <sup>f</sup>                  | 8.0 <sup>d</sup>                  | 0.0 <sup>d</sup>                   |
| et-UE       | 0.0 <sup>c</sup>                 | 0.0 <sup>i</sup>                  | 9.0 <sup>c</sup>                  | 0.0 <sup>d</sup>                   |
| w-COMB      | 0.0 <sup>c</sup>                 | 7.0 <sup>g</sup>                  | 8.0 <sup>d</sup>                  | 0.0 <sup>d</sup>                   |
| et-COMB     | 0.0 <sup>c</sup>                 | 0.0 <sup>i</sup>                  | 7.0 <sup>f</sup>                  | 0.0 <sup>d</sup>                   |
| w-COMB-HT   | 0.0 <sup>c</sup>                 | 8.0 <sup>f</sup>                  | 8.0 <sup>d</sup>                  | 0.0 <sup>d</sup>                   |
| et-COMB-HT  | 7.0 <sup>b</sup>                 | 7.0 <sup>h</sup>                  | 8.0 <sup>c</sup>                  | 7.0 <sup>c</sup>                   |

Means (n=2) in the same column with different letters were significantly different (P<0.05, ANOVA, t-student). Caption: “w” distilled water, “et” ethanol 50% (v/v) solvent, “SE” short extraction, “LE” 24h extraction, “LE-HT” 24h extraction with high temperature, “UE” ultrasound extraction, “COMB” combined methods (LE+UE), “COMB-HT” combined methods (LE-HT+UE).

**Table S4.** Halo measurements for the extracts according to solvent and extraction method used.

|                     | <i>S. aureus</i><br>(ATCC 23235) | <i>A. hydrophila</i><br>(C2GSPA1) | <i>P. aeruginosa</i><br>(C3GSPR1) | <i>V. fluvialis</i><br>(RimA1TCBS) |
|---------------------|----------------------------------|-----------------------------------|-----------------------------------|------------------------------------|
| Solvent             |                                  |                                   |                                   |                                    |
| w                   | 1.17 <sup>b</sup>                | 8.17 <sup>a</sup>                 | 8.17 <sup>b</sup>                 | 3.67 <sup>a</sup>                  |
| Et:H <sub>2</sub> O | 4.67 <sup>a</sup>                | 4.17 <sup>b</sup>                 | 8.67 <sup>a</sup>                 | 2.33 <sup>b</sup>                  |
| Method              |                                  |                                   |                                   |                                    |
| SE                  | 3.5 <sup>a</sup>                 | 4.0 <sup>d</sup>                  | 8.5 <sup>b</sup>                  | 3.5 <sup>b</sup>                   |
| LE                  | 3.5 <sup>a</sup>                 | 8.5 <sup>b</sup>                  | 8.5 <sup>b</sup>                  | 3.5 <sup>b</sup>                   |
| LE-HT               | 3.5 <sup>a</sup>                 | 9.5 <sup>a</sup>                  | 9.5 <sup>a</sup>                  | 7.5 <sup>a</sup>                   |
| UE                  | 3.5 <sup>a</sup>                 | 4.0 <sup>d</sup>                  | 8.5 <sup>b</sup>                  | 0.0 <sup>c</sup>                   |
| COMB                | 0.0 <sup>b</sup>                 | 3.5 <sup>c</sup>                  | 7.5 <sup>d</sup>                  | 0.0 <sup>c</sup>                   |
| COMB-HT             | 3.5 <sup>a</sup>                 | 7.5 <sup>c</sup>                  | 8.0 <sup>c</sup>                  | 3.5 <sup>b</sup>                   |

Means (n=2) in the same column with different letters were significantly different (P<0.05, ANOVA, t-student). Caption: “w” distilled water, “et” ethanol 50% (v/v) solvent, “SE” short extraction, “LE” 24h extraction, “LE-HT” 24h extraction with high temperature, “UE” ultrasound extraction, “COMB” combined methods (LE+UE), “COMB-HT” combined methods (LE-HT+UE).

**Table S5.** Halo measurements for the extracts combined with gentamicin (CN10) compared with the positive control (gentamicin).

|             | <i>S. aureus</i><br>(ATCC 23235) | <i>S. aureus</i><br>(C511) | <i>S. aureus</i><br>(C612) | <i>E. faecium</i><br>(C1) | <i>E. faecium</i><br>(C14) | <i>E. coli</i><br>(ATCC 25922) | <i>A. hydrophila</i><br>(C2GSPA1) | <i>P. aeruginosa</i><br>(C3GSPR1) | <i>V. fluvialis</i><br>(RimA1TCBS) |
|-------------|----------------------------------|----------------------------|----------------------------|---------------------------|----------------------------|--------------------------------|-----------------------------------|-----------------------------------|------------------------------------|
| Control (+) | 18.0 <sup>b</sup>                | 15.0 <sup>b</sup>          | 17.0 <sup>a</sup>          | 17.0 <sup>ab</sup>        | 16.0 <sup>c</sup>          | 16.0 <sup>a</sup>              | 18.0 <sup>a</sup>                 | 12.0 <sup>c</sup>                 | 23.0 <sup>a</sup>                  |
| w-SE        | 16.0 <sup>d</sup>                | 13.0 <sup>d</sup>          | 16.5 <sup>ab</sup>         | 15.0 <sup>d</sup>         | 15.0 <sup>d</sup>          | 0.0 <sup>j</sup>               | 16.0 <sup>c</sup>                 | 9.0 <sup>e</sup>                  | 20.0 <sup>c</sup>                  |
| et-SE       | 17.0 <sup>c</sup>                | 13.0 <sup>d</sup>          | 15.5 <sup>b</sup>          | 15.0 <sup>d</sup>         | 15.0 <sup>d</sup>          | 14.0 <sup>d</sup>              | 16.0 <sup>c</sup>                 | 10.0 <sup>d</sup>                 | 20.0 <sup>d</sup>                  |
| w-LE        | 16.0 <sup>d</sup>                | 14.0 <sup>c</sup>          | 16.5 <sup>ab</sup>         | 16.0 <sup>c</sup>         | 16.0 <sup>c</sup>          | 0.0 <sup>j</sup>               | 17.0 <sup>b</sup>                 | 9.0 <sup>e</sup>                  | 20.0 <sup>d</sup>                  |
| et-LE       | 17.0 <sup>c</sup>                | 13.0 <sup>d</sup>          | 16.5 <sup>ab</sup>         | 16.5 <sup>bc</sup>        | 16.5 <sup>bc</sup>         | 14.0 <sup>c</sup>              | 15.0 <sup>d</sup>                 | 10.0 <sup>d</sup>                 | 21.0 <sup>b</sup>                  |
| w-LE-HT     | 17.0 <sup>c</sup>                | 15.0 <sup>b</sup>          | 17.0 <sup>a</sup>          | 16.0 <sup>c</sup>         | 16.0 <sup>c</sup>          | 7.0 <sup>i</sup>               | 18.0 <sup>a</sup>                 | 13.0 <sup>a</sup>                 | 20.0 <sup>d</sup>                  |
| et-LE-HT    | 16.0 <sup>d</sup>                | 14.0 <sup>c</sup>          | 16.5 <sup>ab</sup>         | 16.0 <sup>c</sup>         | 16.0 <sup>c</sup>          | 12.0 <sup>f</sup>              | 14.0 <sup>e</sup>                 | 9.0 <sup>e</sup>                  | 20.0 <sup>d</sup>                  |
| w-UE        | 17.0 <sup>c</sup>                | 14.0 <sup>c</sup>          | 16.5 <sup>ab</sup>         | 16.0 <sup>c</sup>         | 16.0 <sup>c</sup>          | 16.0 <sup>a</sup>              | 16.0 <sup>c</sup>                 | 9.0 <sup>e</sup>                  | 20.0 <sup>d</sup>                  |
| et-UE       | 17.0 <sup>c</sup>                | 13.0 <sup>d</sup>          | 16.0 <sup>ab</sup>         | 17.0 <sup>ab</sup>        | 17.0 <sup>ab</sup>         | 15.0 <sup>b</sup>              | 15.0 <sup>d</sup>                 | 9.0 <sup>e</sup>                  | 20.0 <sup>d</sup>                  |
| w-COMB      | 16.0 <sup>d</sup>                | 14.0 <sup>c</sup>          | 16.5 <sup>ab</sup>         | 16.5 <sup>bc</sup>        | 16.5 <sup>bc</sup>         | 13.0 <sup>e</sup>              | 16.0 <sup>c</sup>                 | 9.0 <sup>e</sup>                  | 20.0 <sup>d</sup>                  |
| et-COMB     | 17.0 <sup>c</sup>                | 13.0 <sup>d</sup>          | 16.0 <sup>ab</sup>         | 16.0 <sup>c</sup>         | 16.0 <sup>c</sup>          | 12.0 <sup>g</sup>              | 15.0 <sup>d</sup>                 | 9.0 <sup>e</sup>                  | 19.0 <sup>e</sup>                  |
| w-COMB-HT   | 17.0 <sup>c</sup>                | 14.0 <sup>c</sup>          | 16.5 <sup>ab</sup>         | 16.5 <sup>bc</sup>        | 16.5 <sup>bc</sup>         | 13.0 <sup>e</sup>              | 16.0 <sup>c</sup>                 | 9.0 <sup>e</sup>                  | 20.0 <sup>d</sup>                  |
| et-COMB-HT  | 18.0 <sup>a</sup>                | 15.0 <sup>a</sup>          | 16.5 <sup>ab</sup>         | 17.5 <sup>a</sup>         | 17.5 <sup>a</sup>          | 9.0 <sup>h</sup>               | 16.0 <sup>c</sup>                 | 12.0 <sup>b</sup>                 | 20.0 <sup>d</sup>                  |

Means (n=2) in the same column with different letters were significantly different (P<0.05, ANOVA, t-student). Caption: “w” distilled water, “et” ethanol 50% (v/v) solvent, “SE” short extraction, “LE” 24h extraction, “LE-HT” 24h extraction with high temperature, “UE” ultrasound extraction, “COMB” combined methods (LE+UE), “COMB-HT” combined methods (LE-HT+UE).

**Table S6.** Halo measurements for the extracts combined with gentamicin according to solvent and extraction method used.

|                     | <i>S. aureus</i><br>(ATCC 23235) | <i>S. aureus</i><br>(C511) | <i>S. aureus</i><br>(C612) | <i>E. faecium</i><br>(C1) | <i>E. faecium</i><br>(C14) | <i>E. coli</i><br>(ATCC 25922) | <i>A. hydrophila</i><br>(C2GSPA1) | <i>P. aeruginosa</i><br>(C3GSPR1) | <i>V. fluvialis</i><br>(RimA1TCBS) |
|---------------------|----------------------------------|----------------------------|----------------------------|---------------------------|----------------------------|--------------------------------|-----------------------------------|-----------------------------------|------------------------------------|
| Solvent             |                                  |                            |                            |                           |                            |                                |                                   |                                   |                                    |
| H <sub>2</sub> O    | 16.50 <sup>b</sup>               | 14.00 <sup>a</sup>         | 16.58 <sup>a</sup>         | 16.00 <sup>a</sup>        | 16.00 <sup>a</sup>         | 8.17 <sup>b</sup>              | 16.50 <sup>a</sup>                | 9.67 <sup>b</sup>                 | 20.08 <sup>a</sup>                 |
| Et:H <sub>2</sub> O | 17.00 <sup>a</sup>               | 13.50 <sup>b</sup>         | 16.17 <sup>a</sup>         | 16.33 <sup>a</sup>        | 16.33 <sup>a</sup>         | 12.67 <sup>a</sup>             | 15.17 <sup>b</sup>                | 9.83 <sup>a</sup>                 | 20.00 <sup>a</sup>                 |
| Method              |                                  |                            |                            |                           |                            |                                |                                   |                                   |                                    |
| SE                  | 16.50 <sup>c</sup>               | 13.00 <sup>c</sup>         | 16.00 <sup>a</sup>         | 15.00 <sup>c</sup>        | 15.00 <sup>c</sup>         | 7.00 <sup>c</sup>              | 16.00 <sup>a</sup>                | 9.50 <sup>c</sup>                 | 20.25 <sup>ab</sup>                |
| LE                  | 16.50 <sup>c</sup>               | 13.50 <sup>b</sup>         | 16.50 <sup>a</sup>         | 16.25 <sup>b</sup>        | 16.25 <sup>b</sup>         | 7.00 <sup>c</sup>              | 16.00 <sup>a</sup>                | 9.50 <sup>c</sup>                 | 20.50 <sup>a</sup>                 |
| LE-HT               | 16.50 <sup>c</sup>               | 14.50 <sup>a</sup>         | 16.75 <sup>a</sup>         | 16.00 <sup>b</sup>        | 16.00 <sup>b</sup>         | 9.50 <sup>d</sup>              | 16.00 <sup>a</sup>                | 11.00 <sup>a</sup>                | 20.00 <sup>b</sup>                 |
| UE                  | 17.00 <sup>b</sup>               | 13.50 <sup>b</sup>         | 16.25 <sup>a</sup>         | 16.50 <sup>ab</sup>       | 16.50 <sup>ab</sup>        | 15.50 <sup>a</sup>             | 15.50 <sup>b</sup>                | 9.00 <sup>d</sup>                 | 20.00 <sup>b</sup>                 |
| COMB                | 16.50 <sup>c</sup>               | 13.50 <sup>b</sup>         | 16.25 <sup>a</sup>         | 16.25 <sup>b</sup>        | 16.25 <sup>b</sup>         | 12.50 <sup>b</sup>             | 15.50 <sup>b</sup>                | 9.00 <sup>d</sup>                 | 19.50 <sup>c</sup>                 |
| COMB-HT             | 17.50 <sup>a</sup>               | 14.50 <sup>a</sup>         | 16.50 <sup>a</sup>         | 17.00 <sup>a</sup>        | 17.00 <sup>a</sup>         | 11.00 <sup>c</sup>             | 16.00 <sup>a</sup>                | 10.50 <sup>b</sup>                | 20.00 <sup>b</sup>                 |

Means (n=2) in the same column with different letters were significantly different (P<0.05, ANOVA, t-student). Caption: “w” distilled water, “et” ethanol 50% (v/v) solvent, “SE” short extraction, “LE” 24h extraction, “LE-HT” 24h extraction with high temperature, “UE” ultrasound extraction, “COMB” combined methods (LE+UE), “COMB-HT” combined methods (LE-HT+UE).
